# Supplementary material
Source: PubMed Central journal article supplement (PMC4167359)
Supplement: NIHMS624776-supplement-Table.pdf [file NIHMS624776-supplement-Table.pdf]

**Supplementary Table. Pre- and peri-operative characteristics of patients undergoing partial nephrectomy stratified by preoperative eGFR <60 or ≥60 Summary statistics are median (interquartile range) or frequency (%).**

|                                              | Partial Nephrectomy(n=88)    |                              |
|----------------------------------------------|------------------------------|------------------------------|
|                                              | Preoperative eGFR <60 (n=18) | Preoperative eGFR ≥60 (n=70) |
| <b>Age at surgery (years)</b>                | 69 (60, 72)                  | 56 (48, 65)                  |
| <b>Female</b>                                | 7 (39%)                      | 26 (37%)                     |
| <b>Diabetes</b>                              | 3 (17%)                      | 9 (13%)                      |
| <b>Cardiovascular Disease</b>                | 16 (89%)                     | 41 (59%)                     |
| <b>Preoperative uNGAL</b>                    | 5.3 (3.2, 8.8)               | 6.2 (3.6, 10.0)              |
| <b>Preoperative Normalized uNGAL*</b>        | 8.5 (3.1, 15.7)              | 5.0 (2.2, 8.2)               |
| <b>Preoperative uCreatinine *</b>            | 79.4 (49.1, 136.4)           | 139.4 (76.1, 180.7)          |
| <b>Preoperative eGFR</b>                     | 50.0 (42.0, 55.0)            | 84.0 (73.0, 99.0)            |
| <b>Estimated Blood Loss (5 missing data)</b> | 125 (100, 250)               | 200 (150, 450)               |
| <b>Acute Kidney Injury (AKIN)</b>            | 6 (33%)                      | 9 (13%)                      |
| <b>Cold Ischemia</b>                         | 9 (53%)                      | 57 (81%)                     |
| <b>Cold Ischemia Duration</b>                | 24 (21, 32)                  | 29 (22, 38)                  |
| <b>Warm Ischemia</b>                         | 4 (24%)                      | 11 (16%)                     |
| <b>Warm Ischemia Time</b>                    | 24 (15, 31)                  | 18 (10, 28)                  |
| <b>No Ischemia</b>                           | 4 (24%)                      | 2 (3%)                       |
| <b>Mannitol</b>                              | 15 (83%)                     | 65 (93%)                     |
| <b>Stage</b>                                 |                              |                              |
| T1a                                          | 11 (61%)                     | 49 (70%)                     |
| T1b                                          | 7 (39%)                      | 16 (23%)                     |
| T2a                                          | 0 (0%)                       | 5 (7%)                       |

Abbreviations: uNGAL = neutrophil gelatinase-associated lipocalin; uCreatinine = urinary creatinine, eGFR = estimated glomerular filtration rate, AKIN = Acute Kidney Injury Network

\* uCreatinine data were not available for 40 partial nephrectomy patients (51%); 7 (39%) in the preoperative eGFR <60 group and 33 (47%) in the eGFR >60 group
